# Supplementary material for: Mechanism of photocatalytic activity improvement of AgNPs/TiO2by oxygen plasma irradiation
Source: Royal Society of Chemistry journal article supplement (doi:10.1039/c6nr04862e), 2016-01-01
Supplement: c6nr04862e1.pdf [file c6nr04862e1.pdf]

## **Supporting Information**

### **Mechanism of photocatalytic activity improvement of AgNPs/TiO<sub>2</sub> by oxygen plasma irradiation**

Yingcui Fang<sup>a\*</sup>, Bing Zhang<sup>a</sup>, Liu Hong<sup>a</sup>, Kang Zhang<sup>a</sup>, Gongpu Li<sup>b</sup>, Jun Jiang<sup>b\*</sup>, Rong Yan<sup>c</sup>, Junling Chen<sup>c\*</sup>

<sup>a</sup>Department of Vacuum Science and Technology, Hefei University of Technology, Hefei, 230009.

<sup>b</sup>Hefei National Laboratory for Physical Sciences at the Microscale, iChEM (Collaborative Innovation Center of Chemistry for Energy Materials), and School of Chemistry and Materials Science, University of Science and Technology of China, Hefei, 230026, China.

<sup>c</sup>Institute of Plasma Physics, Chinese Academy of Sciences, Hefei, 230031, China.

1. The sketch of photocatalysis setup.

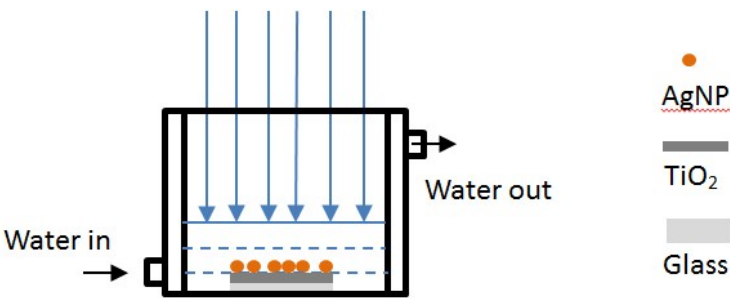

Figure S1 The sketch of photocatalysis setup.

2. Photocatalytic efficiency ( $k_t$ ) under UV and visible lights of samples 10sAgNPs/TiO<sub>2</sub>, 30sAgNPs/TiO<sub>2</sub>, 60sAgNPs/TiO<sub>2</sub> without OPI ( $k_0$ ) and with OPI for 2 s ( $k_2$ ), and the corresponding PAIs ( $\eta$ ).

Table S1

| Samples      | UV light |       |        | Visible light |       |        |
|--------------|----------|-------|--------|---------------|-------|--------|
|              | $k_0$    | $k_2$ | $\eta$ | $k_0$         | $k_2$ | $\eta$ |
| 10sAgNPs/TiO | 0.021    | 0.03  | 43%    | 0.03          | 0.035 | 17%    |
| 2            |          |       |        |               |       |        |
| 30sAgNPs/TiO | 0.024    | 0.041 | 71%    | 0.047         | 0.059 | 26%    |
| 2            |          |       |        |               |       |        |
| 60sAgNPs/TiO | 0.016    | 0.023 | 44%    | 0.035         | 0.042 | 20%    |
| 2            |          |       |        |               |       |        |

3. Photocatalytic efficiencies ( $k_t$ ) under UV and visible lights of sample 30sAgNPs/TiO<sub>2</sub> ( $t=0$ ), and the ones with OPI for 2, 5 and 10 s, and the corresponding PAIs ( $\eta$ )

Table S2

| UV light |       |        | Visible light |        |
|----------|-------|--------|---------------|--------|
| t (s)    | $k_t$ | $\eta$ | $k_t$         | $\eta$ |
| 0        | 0.024 |        | 0.047         |        |

|    |       |      |       |     |
|----|-------|------|-------|-----|
| 2  | 0.041 | 71%  | 0.059 | 26% |
| 5  | 0.052 | 117% | 0.074 | 57% |
| 10 | 0.036 | 52%  | 0.063 | 34% |

4. Histograms of 10sAgNPs(a), 30sAgNPs(b), 60sAgNPs(c), 30sAgNPs-OPI-2s (d), and 30sAgNPs-OPI-5s (e).

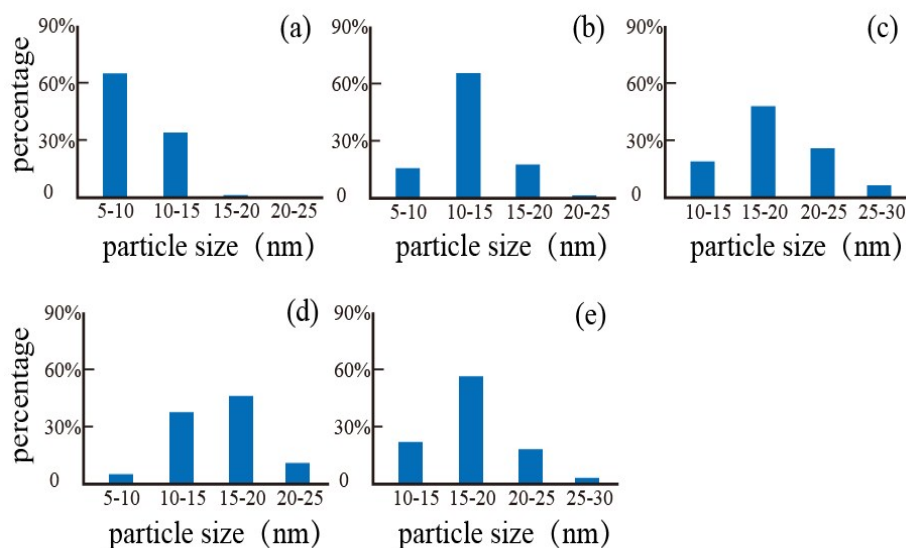

Figure S2 The histograms of 10sAgNPs(a), 30sAgNPs(b), 60sAgNPs(c), 30sAgNPs-OPI-2s (d), and 30sAgNPs-OPI-5s (e).

5. Percentage (%) of metallic silver (368.2 eV) and oxidized silver (367.8 eV) of samples 30sAgNPs-OPI-2s, 30sAgNPs-OPI-5s and 30sAgNPs-OPI-10s calculated by the component's peak area of the XPS spectra of Ag 3d<sub>5/2</sub>.

Table S3

| Peak BE (eV) | 367.8 | 368.2 |
|--------------|-------|-------|
| OPI-2s       | 27.8  | 72.2  |
| OPI-5s       | 34.2  | 65.8  |
| OPI-10s      | 57.4  | 42.6  |

## 6. Determine the substance according to TEM images

According to PDF-2004, we attribute the left part of figure 4 in the manuscript as hexagonal crystal system silver, the crystal face with an inter-planar spacing between 0.243-0.244 is Ag (004), between 0.207-0.211 is Ag (1-12), and with  $d=0.196$  is Ag (103). Then we calculate the angles between two neighboring faces and compare them with the corresponding measured angles.

The angle is calculated by the following formulae (for hexagonal crystal system)

$$\cos\theta = \frac{h_1h_2 + k_1k_2 + \frac{1}{2}(h_1k_2 + h_2k_1) + \frac{3a^2}{4c^2}l_1l_2}{\sqrt{(h_1^2 + k_1^2 + h_1k_1 + \frac{3a^2}{4c^2}l_1^2)(h_2^2 + k_2^2 + h_2k_2 + \frac{3a^2}{4c^2}l_2^2)}}$$

Here,  $a=b=0.28862$ ,  $c=1$ ;

For the Ag (004) and Ag(1-12),  $h_1=0$ ,  $k_1=0$ ,  $l_1=4$ ,  $h_2=1$ ,  $k_2=-1$ ,  $l_2=2$ , the calculated angle is  $63.4^\circ$  and the measured one is  $68^\circ$ . The angles between two other faces are calculated in the same way and the results are listed in Table S4. The errors are smaller than 7% thus the results are acceptable.

Table S4 Comparison of the calculated and measured angles between two faces

| Faces                | Calculated    | Measured   | Error |
|----------------------|---------------|------------|-------|
| Ag(004) and Ag(1-12) | $63.4^\circ$  | $68^\circ$ | 7%    |
| Ag(1-12) and Ag(103) | $51.24^\circ$ | $51^\circ$ | 0%    |
| Ag(004) and Ag(103)  | $53.15^\circ$ | $57^\circ$ | 7%    |

It is difficult to determine the component of the right part of figure 4, since only one dimension inter-planar spacing can be measured. We suppose that another inter-planar spacing is 0.244, which is same as the left part, and at the same time suppose that the right part is Ag, Ag<sub>2</sub>O and AgO, respectively, and try to calculate the angles and compare them with the measured ones. It is found that Ag<sub>2</sub>O fits best. We thus attribute the right part to Ag<sub>2</sub>O.

7. The XPS spectra of O1s lines and their fittings of AgNPs/TiO<sub>2</sub> after OPI for 2, 5 and 10 seconds.

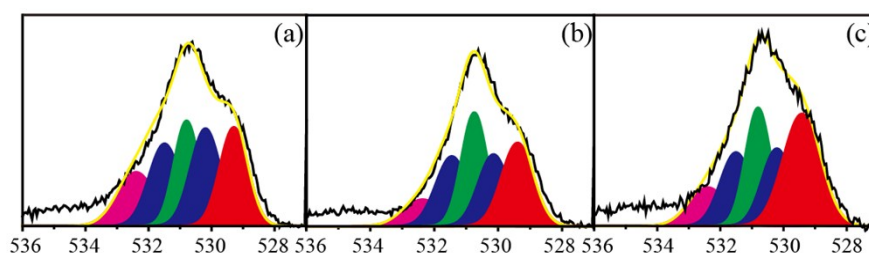

Figure S3 The O1s lines and their fittings of 30sAgNPs/TiO<sub>2</sub> after OPI for 2s (a), 5s (b) and 10s (c).

Table S5 The content and the FWHM of each component with binding energies at 529.4, 530.2, 530.8, 531.5 and 532.4 eV of the sample 30sAgNPs/TiO<sub>2</sub>, after OPI for 2, 5 and 10 seconds.

Table S5

|        | 529.4 eV |            | 530.2 eV |            | 530.8 eV |            | 531.5 eV |            | 532.4 eV |            |
|--------|----------|------------|----------|------------|----------|------------|----------|------------|----------|------------|
|        | %        | FWHM<br>eV |
| OPI-2s | 21.5     | 0.9        | 22.4     | 0.8        | 20.4     | 0.8        | 20       | 1          | 15.7     | 1.2        |
| OPI-5s | 24.2     | 1          | 19.8     | 0.95       | 26.4     | 0.8        | 20.4     | 1          | 9.3      | 1.2        |

8. The energy levels sketch describing the Schottky barrier  $\Delta$  (a), and the transferring of the excited electrons (b). The electrons are excited from the VB of  $\text{TiO}_2$  to its CB, among which energetic electrons will jump to AgNPs, due to its energy larger than the Schottky barrier; while those with energy smaller than the Schottky barrier stay in the CB of  $\text{TiO}_2$ . Holes transfer to AgNPs no matter the energy of the electrons is low or high; however, the migration speed depends on the interface and the Schottky barrier.

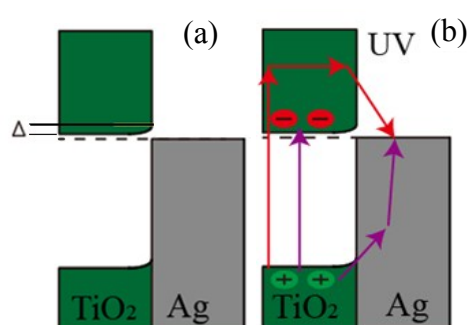

Figure S4 The sketch of energy levels describing the Schottky barrier  $\Delta$  (a), and the transferring of the excited electrons (b).

9. The spectrum of Xe lamp

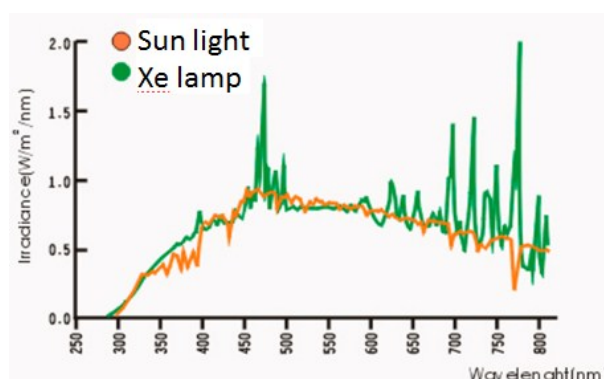

Figure S5 The absorption spectra of Xe lamp and sun light.

## 10. Photodegradation of AgNPs/TiO<sub>2</sub>

Rhodamine 6 G (R6G) with concentration of  $10^{-5}$  mol/l was chosen to be degraded under UV light and visible lights, respectively. The light source is a PL-X500D Xenon lamp with power of 300W. The lamp is set at a distance about 135 mm above the solution and illuminates the solution evenly from the top for 1hrs. The photocatalytic efficiency of AgNPs/TiO<sub>2</sub> can be expressed as  $k_t = -\ln(C_t/C)$ , where  $C$  is the initial concentration of R6G before degradation, and  $C_t$  is the final concentration after 1 hrs degradation under UV or visible light, where  $t$  is the deposition time of Ag. The results are shown in figure S6. With the increasing of silver content, the degradation efficiency increases at first and then decreases.

The photocatalytic activity improvement (PAI) can be calculated with the formulae  $\eta = (k_t - k_0)/k_0$ ,  $k_0$  refers to  $t=0$ s (without Ag deposition), and the results are shown in Table S6. Under UV light, after 10 s deposition of silver, the improvement is about 24%, and it increases to 41% when Ag content reaches 30s, however, it decreases to -6% when the content of Ag increases to 60s. Under visible light, After 10 s deposition of silver, the improvement is 67%, and it increases to 161 % when the content of AgNPs reaches 30 s, while it decreases to 94% when the content of Ag increases to 60s.

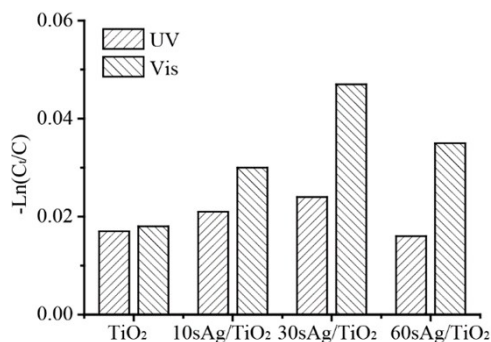

Figure S6 Photocatalytic efficiency ( $k_t$ ) under UV light and visible lights of samples TiO<sub>2</sub>,

10sAg/TiO<sub>2</sub>, 30sAg/TiO<sub>2</sub>, and 60sAg/TiO<sub>2</sub>, t is the deposition time of Ag.

| Table | UV-light               |       |        | visible-light |        | S6 Photocatalytic efficiency ( $k_t$ ) and improvements ( $\eta$ ) under and visible lights of samples TiO <sub>2</sub> , 10sAg/TiO <sub>2</sub> , 30sAg/TiO <sub>2</sub> and 60sAg/TiO <sub>2</sub> , t is the deposition time of Ag. |
|-------|------------------------|-------|--------|---------------|--------|----------------------------------------------------------------------------------------------------------------------------------------------------------------------------------------------------------------------------------------|
|       | Samples                | $k_t$ | $\eta$ | $k_t$         | $\eta$ |                                                                                                                                                                                                                                        |
| UV    | TiO <sub>2</sub>       | 0.017 |        | 0.018         |        |                                                                                                                                                                                                                                        |
|       | 10sAg/TiO <sub>2</sub> | 0.021 | 24%    | 0.030         | 67%    |                                                                                                                                                                                                                                        |
|       | 30sAg/TiO <sub>2</sub> | 0.024 | 41%    | 0.047         | 161%   |                                                                                                                                                                                                                                        |
|       | 60sAg/TiO <sub>2</sub> | 0.016 | -6%    | 0.035         | 94%    |                                                                                                                                                                                                                                        |

30sAg/TiO<sub>2</sub> and 60sAg/TiO<sub>2</sub>, t is the deposition time of Ag.

## 11. The model of AgNP oxidation

The left sample (a) in figure S7 has a configuration of Ag<sub>2</sub>O (top)/AgNPs (middle) /TiO<sub>2</sub> (bottom), this is what exactly described in figure 5b in the manuscript. The middle sample (b) in figure S7 has a configuration of Ag<sub>2</sub>O (shell)/Ag (core)/TiO<sub>2</sub>, which seems to be the most

possible case in our experiments. We discuss this situation.

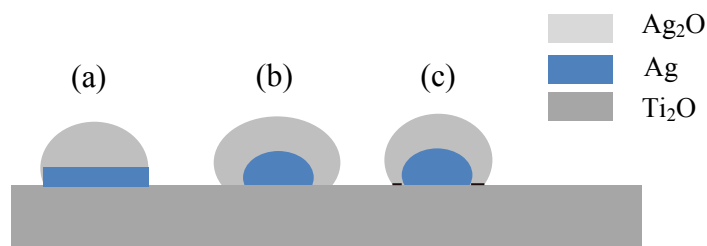

Figure S7 The models of the oxidization of AgNP/TiO<sub>2</sub>

Since Ag<sub>2</sub>O grows from silver thus the binding between Ag<sub>2</sub>O and Ag is definitely strong, but there is no binding between Ag<sub>2</sub>O and TiO<sub>2</sub> and there might be lane between them if the intension makes Ag<sub>2</sub>O shrink, as shown in figure S7 (c). Under this circumstance, the contact between Ag<sub>2</sub>O and TiO<sub>2</sub> is not good, thus figure 5d is still suitable.

12. Photocatalytic efficiency ( $k_t$ ) under UV, visible, and UV-visible lights of sample 30sAgNPs/TiO<sub>2</sub> without and with OPI for 2s and the corresponding PAIs ( $\eta$ ).

Table S7

| t (s) | UV light |        | Visible light |        | UV-Visible light |        |
|-------|----------|--------|---------------|--------|------------------|--------|
|       | $k_t$    | $\eta$ | $k_t$         | $\eta$ | $k_t$            | $\eta$ |
| 0     | 0.023    |        | 0.044         |        | 0.03             |        |
| 2     | 0.052    | 126%   | 0.064         | 45%    | 0.057            | 90%    |
